# Supplementary material for: I-Impute: a self-consistent method to impute single cell RNA sequencing data
Source: PubMed Central journal article supplement (PMC7677776; doi:10.1186/s12864-020-07007-w), 2020-11-18
Supplement: 12864_2020_7007_MOESM1_ESM.pdf [file 12864_2020_7007_MOESM1_ESM.pdf]

I-Impute: a self-consistent method to impute  
single cell RNA sequencing data

Additional file 1

Xikang Feng+, Lingxi Chen+, Zishuang Wang, Shuai Cheng Li\*

November 18, 2019

**Contents**

|          |                              |          |
|----------|------------------------------|----------|
| <b>1</b> | <b>Supplementary Figures</b> | <b>2</b> |
| <b>2</b> | <b>Supplementary Tables</b>  | <b>3</b> |

# 1 Supplementary Figures

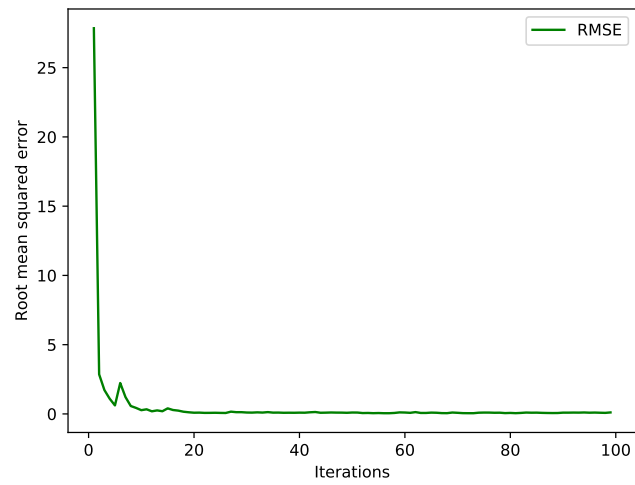

Figure S1: Iteration analysis based on synthetic data (88.45% dropout). The root mean squared error (RMSE) is stable below 0.1.

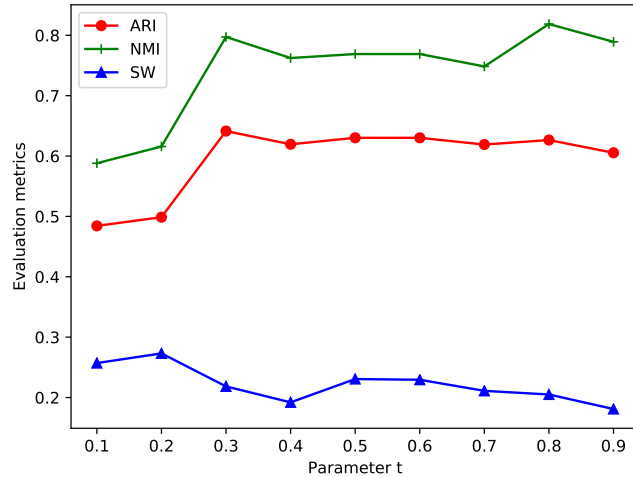

Figure S2: Clustering results of imputed data based on mouse Bladder cells dataset when different values of parameter  $t$  are used in I-Impute. This result suggests that the value of parameter  $t$  should not be too small. The default value of parameter  $t$  is 0.5.

## 2 Supplementary Tables

Table S1: Imputation performance on synthetic data (88.45% dropout)

| Method         | ARI           | NMI           | SW            |
|----------------|---------------|---------------|---------------|
| Raw            | 0.5161        | 0.5787        | 0.2627        |
| 88.45% Dropout | 0.4363        | 0.5467        | 0.0862        |
| SAVER          | 0.7473        | 0.7145        | 0.1075        |
| scImpute       | 0.0531        | 0.0989        | 0.0742        |
| C-Impute       | 0.6860        | 0.7512        | 0.1705        |
| I-Impute       | <b>0.8721</b> | <b>0.8521</b> | <b>0.2429</b> |

Table S2: Imputation performance on synthetic data (63.29% dropout)

| Method         | ARI        | NMI        | SW            |
|----------------|------------|------------|---------------|
| Raw            | 0.5161     | 0.5787     | 0.2627        |
| 63.29% Dropout | 0.3105     | 0.4115     | 0.1910        |
| SAVER          | 0.9784     | 0.9700     | 0.2739        |
| scImpute       | 0.2033     | 0.3904     | 0.2054        |
| C-Impute       | 0.9644     | 0.9509     | 0.2496        |
| I-Impute       | <b>1.0</b> | <b>1.0</b> | <b>0.3908</b> |

Table S3: Imputation performance on synthetic data (45.16% dropout)

| Method         | ARI           | NMI           | SW            |
|----------------|---------------|---------------|---------------|
| Raw            | 0.5161        | 0.5787        | 0.2627        |
| 45.16% Dropout | 0.6000        | 0.6306        | 0.2137        |
| SAVER          | 0.9801        | 0.9710        | 0.3292        |
| scImpute       | 0.3596        | 0.4962        | 0.2365        |
| C-Impute       | 0.4727        | 0.5551        | 0.2566        |
| I-Impute       | <b>0.9801</b> | <b>0.9710</b> | <b>0.4123</b> |

Table S4: Pearson correlation result on synthetic data

| Method   | 88.45% Dropout | 63.29% Dropout | 45.16% Dropout |
|----------|----------------|----------------|----------------|
| SAVER    | 0.5836         | 0.7915         | 0.8764         |
| scImpute | 0.6451         | 0.8582         | 0.9263         |
| C-Impute | 0.7611         | 0.8873         | 0.9305         |
| I-Impute | <b>0.7812</b>  | <b>0.8993</b>  | <b>0.9357</b>  |

Table S5: Imputation performance on mouse Bladder cells data

| Method   | ARI           | NMI           | SW            |
|----------|---------------|---------------|---------------|
| Raw      | 0.1937        | 0.4500        | 0.0737        |
| SAVER    | 0.5253        | 0.7085        | 0.0621        |
| scImpute | 0.1937        | 0.4500        | 0.0686        |
| C-Impute | 0.1664        | 0.4317        | 0.0741        |
| I-Impute | <b>0.6054</b> | <b>0.7892</b> | <b>0.1758</b> |

Table S6: Imputation performance on mouse ES cells data

| Method   | ARI           | NMI           | SW            |
|----------|---------------|---------------|---------------|
| Raw      | 0.2410        | 0.5160        | 0.0353        |
| SAVER    | 0.6920        | 0.7329        | 0.2235        |
| scImpute | 0.3574        | 0.5258        | 0.0418        |
| C-Impute | 0.2410        | 0.5160        | 0.0411        |
| I-Impute | <b>0.7047</b> | <b>0.7444</b> | <b>0.2275</b> |

Table S7: Imputation performance on mouse Aortic Leukocyte cells data

| Method   | ARI           | NMI           | SW            |
|----------|---------------|---------------|---------------|
| Raw      | 0.3463        | 0.6352        | 0.0290        |
| SAVER    | 0.3605        | 0.6837        | <b>0.1075</b> |
| scImpute | 0.3377        | 0.6237        | 0.0358        |
| C-Impute | 0.3427        | 0.6398        | 0.0206        |
| I-Impute | <b>0.5220</b> | <b>0.7728</b> | 0.0711        |
